# Supplementary material for: The Application of Multi-Walled Carbon Nanotubes in Bone Tissue Repair Hybrid Scaffolds and the Effect on Cell Growth In Vitro
Source: PubMed Central journal article supplement (PMC6419040; doi:10.3390/polym11020230), 2019-02-01
Supplement: polymers-11-00230-s001.pdf [file polymers-11-00230-s001.pdf]

# Supplementary Materials: The Application of Multi-Walled Carbon Nanotubes in Bone Tissue Repair Hybrid Scaffolds and the Effect on Cell Growth In Vitro

Jie Xu, Xueyan Hu, Siyu Jiang, Yiwei Wang, Roxanne Parungao, Shuangshuang Zheng, Yi Nie \*, Tianqing Liu \* and Kedong Song

**Table S1.** Pore diameter data measured by Image-pro plus software of CS/Gel/nHAP scaffold and CS/Gel/nHAP/MWCNTs scaffolds. The average pore diameter of CS/Gel/nHAP, CS/Gel/nHAP/0.3%MWCNTs, CS/Gel/nHAP/0.6%MWCNTs and CS/Gel/nHAP/0.9%MWCNTs scaffold were about 176  $\mu\text{m}$ , 178  $\mu\text{m}$ , 169  $\mu\text{m}$  and 160  $\mu\text{m}$ , respectively.

| Group   | Control ( $\mu\text{m}$ ) | 0.3% ( $\mu\text{m}$ ) | 0.6% ( $\mu\text{m}$ ) | 0.9% ( $\mu\text{m}$ ) |
|---------|---------------------------|------------------------|------------------------|------------------------|
| Dia.1   | 161.9471                  | 279.8849               | 190.2872               | 162.5022               |
| Dia.2   | 183.1502                  | 256.4079               | 247.1572               | 188.9503               |
| Dia.3   | 174.2129                  | 161.5400               | 136.6163               | 135.2581               |
| Dia.4   | 254.9032                  | 175.6978               | 137.3965               | 160.5140               |
| Dia.5   | 143.0242                  | 145.3488               | 152.9939               | 136.9962               |
| Dia.6   | 122.6716                  | 145.3779               | 182.9518               | 131.6167               |
| Dia.7   | 135.2512                  | 123.6747               | 181.4677               | 140.2875               |
| Dia.8   | 188.605                   | 157.4068               | 154.5053               | 159.9867               |
| Dia.9   | 137.1125                  | 159.9894               | 175.5024               | 148.2818               |
| Dia.10  | 173.7516                  | 165.3658               | 156.4619               | 193.5237               |
| Dia.11  | 198.7056                  | 221.7320               | 172.7116               | 150.9365               |
| Dia.12  | 146.0639                  | 238.9563               | 228.9840               | 154.7512               |
| Dia.13  | 191.0752                  | 176.2740               | 155.4867               | 155.8124               |
| Dia.14  | 118.3242                  | 204.1103               | 226.5353               | 157.8401               |
| Dia.15  | 197.5328                  | 158.6900               | 227.0383               | 142.5284               |
| Dia.16  | 168.0159                  | 136.5041               | 158.6075               | 161.2231               |
| Dia.17  | 219.3801                  | 144.5618               | 157.6456               | 178.3221               |
| Dia.18  | 179.9623                  | 229.2092               | 127.9378               | 172.7116               |
| Dia.19  | 176.8125                  | 163.0241               | 119.6087               | 197.3716               |
| Dia.20  | 241.4203                  | 121.7118               | 93.2031                | 162.1638               |
| Average | 175.5961                  | 178.2734               | 169.1549               | 159.5789               |

Note: Dia. is the abbreviation of diameter.

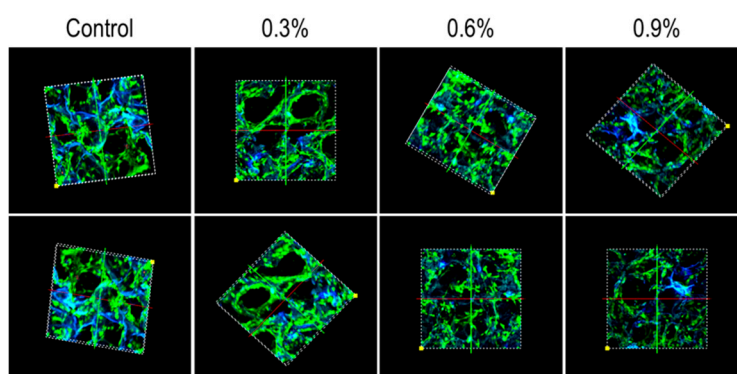

**Figure S1.** The 3D images distribution of MC3T3-E1 cells on different scaffolds. The 3D images show the 3D distribution observed from both sides of the scaffolds (due to the thin slice of 5 mm  $\times$  5 mm  $\times$  1 mm), and the MC3T3-E1 cells distributed on the different layers of the scaffolds.

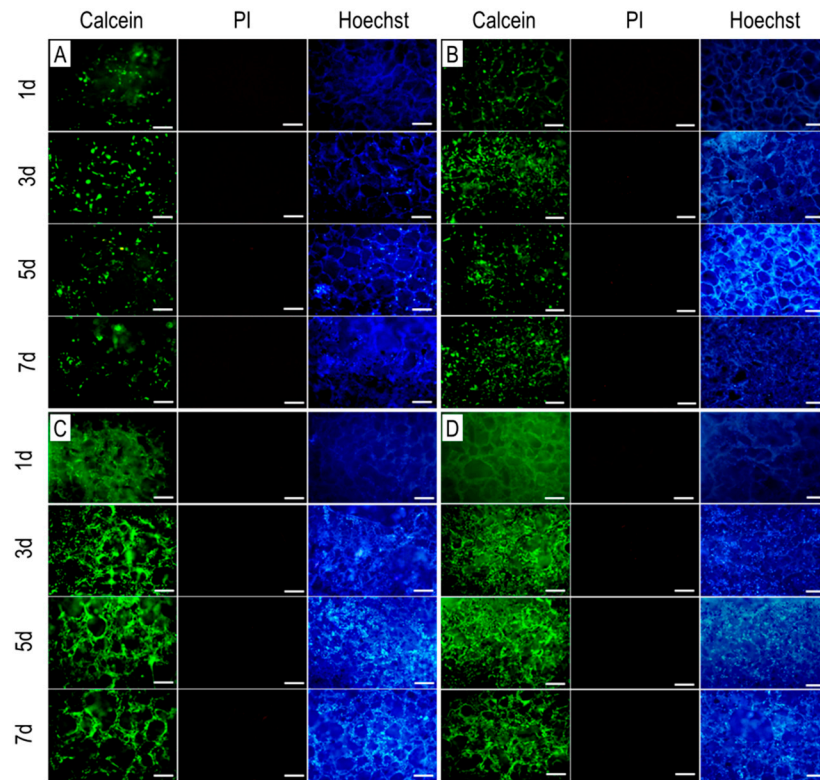

**Figure S2.** Viability and distribution of MC3T3-E1 cells on different scaffolds. The figure shows the live and dead cells cultured on different scaffolds for 1 day, 3 days, 5days and 7 days. (A) Control; (B) 0.3%; (C) 0.6%; (D) 0.9%; Scale: 250  $\mu$ m.
